# Supplementary material for: Plasma Circular RNAs hsa_circ_0001953 and hsa_circ_0009024 as Diagnostic Biomarkers for Active Tuberculosis
Source: Front Microbiol. 2018 Aug 30;9:2010. doi: 10.3389/fmicb.2018.02010 (PMC6126419; doi:10.3389/fmicb.2018.02010)
Supplement: Supplementary file 1 [file Table_1.doc]

**Plasma circular RNAs hsa_circ_0001953 and hsa_circ_0009024 as diagnostic biomarkers for active tuberculosis**

Zikun Huang1, Rigu Su1, Cheng Qing2, Yiping Peng3, Qing Luo1, Junming Li1

1Department of Clinical Laboratory, the First Affiliated Hospital of Nanchang University, Nanchang 33006, China.

2Intensive Care Unit, the First Affiliated Hospital of Nanchang University, Nanchang, 330006, China.

3Department of Tuberculosis, Jiangxi Chest Hospital, Nanchang 330006, China.

| **Table S1.** Primers used for RT-qPCR analysis of circRNA and mRNA levels | | |
| --- | --- | --- |
| Name | Primer sequence 5’-3’ | Product size (bp) |
| GAPDH | F: TGTTGCCATCAATGACCCCTT | 202 |
|  | R: CTCCACGACGTACTCAGCG |  |
| hsa_circ_0009024 | F: TTCCTGAGCAAGAAGTAGCCC | 117 |
|  | R: TAACCCACAAAGTCCAGCTTCT |  |
| hsa_circ_0001953 | F: AGTCATAGATGCCAGCGGGA | 152 |
|  | R: GAGTTTGGCTCTTGTGGCTG |  |
| hsa_circ_0008297 | F: GTAGAGGCAACCGGCAGTAA | 128 |
|  | R: GCTGCAACTCCAACCTGAAC |  |
| hsa_circ_0003528 | F: GCTCTCCTTAAACAGGATATACACA | 113 |
|  | R: TGTCCACTGAGAAGGAATAAGTCA |  |
| hsa_circ_0003524 | F: CAGCAGCTCCTGCCTATTCT | 121 |
|  | R: GCATTTGCATAGGGAACCCC |  |
| hsa_circ_0015879 | F: CAGGAACTTCACCTCCCGATT | 125 |
|  | R: TGCTGGACGTTCTGGTTGGG |  |
