# Supplementary material for: Plasma Circular RNAs hsa_circ_0001953 and hsa_circ_0009024 as Diagnostic Biomarkers for Active Tuberculosis
Source: Front Microbiol. 2018 Aug 30;9:2010. doi: 10.3389/fmicb.2018.02010 (PMC6126419; doi:10.3389/fmicb.2018.02010)
Supplement: Supplementary file 2 [file Table_2.xls]

## Sheet: TB_vs_Control
Table S2. Differentially expressed circRNAs between TB group and healthy group.
# Fold Change cut-off: 1.5 # P-value cut-off: 0.05 # Condition pairs: TB_vs_Control # Column A: probeID it represents probe name. # Column B: P-value, P-value calculated from unpaired t-test. # Column C: FDR, FDR is calculated from Benjamini Hochberg FDR. # Column D: FC (abs), the absolute ratio (no log scale) of normalized intensities between two conditions. # Column E: Regulation, it depicts wh…
probeID	P-value	FDR	FC (abs)	Regulation	Alias	source	chrom	strand	txStart	txEnd	circRNA_type	best_transcript	GeneSymbol	Sequence	[TB_plasma](raw)	[HC_plasma](raw)	[TB_plasma](normalized)	[HC_plasma](normalized)	MRE1	MRE2	MRE3	MRE4	MRE5
ASCRP3012042	4.17569e-06	0.00249228	5.32391	up	hsa_circ_0009024	circBase	chrY	+	21749095	21749393	exonic	NR_045128	TXLNGY	TGCAACAGGAACAAAGAAAAAGTCTTAGTTTGTGAATAGCACAATGGAAGAAGCTGGACT	1585	463.5	10.595	8.29099	hsa-miR-6844	hsa-miR-1248	hsa-miR-141-5p	hsa-miR-545-5p	hsa-miR-95-5p
ASCRP3008864	5.48752e-05	0.00476591	4.66648	up	hsa_circ_0001953	circBase	chrY	+	2821949	2829687	exonic	NM_003411	ZFY	GCAAGATAATGACAAAGCCAGCTGTGAGGACTACCTAATGATTTCGTGAGCTGTGACTAA	1789	798	11.3158	9.09331	hsa-miR-767-5p	hsa-miR-1298-3p	hsa-miR-132-3p	hsa-miR-885-5p	hsa-miR-196a-5p
ASCRP3009569	0.000235706	0.00746233	4.25936	up	hsa_circ_0008297	circBase	chrY	+	15021270	15024974	exonic	NM_004660	DDX3Y	GGCAGTAACTGTCCTCCACATATTGAGAATAAGGGCGCTATATACCTCCTCACTTAAGGA	1215	522	10.6189	8.50135	hsa-miR-4762-5p	hsa-miR-676-5p	hsa-miR-6844	hsa-miR-192-3p	hsa-miR-4436b-5p
ASCRP3009310	0.00885143	0.0481134	3.71021	up	hsa_circ_0003528	circBase	chr5	+	134032815	134044578	exonic	NM_021982	SEC24A	GCTTTTCCCACTTTTTGTGTTGGCTCTCCTTAAACAGGATATACACATGACACCATCCAC	4503	2579.5	12.7752	10.8526	hsa-miR-421	hsa-miR-181a-2-3p	hsa-miR-505-3p	hsa-miR-429	hsa-miR-380-5p
ASCRP3012143	0.000648282	0.0118246	3.6367	up	hsa_circ_0003524	circBase	chr2	-	131829427	131840230	exonic	NM_001009993	FAM168B	TGCCTATTCTCCTAACATGTATCCTGGAGCGAATCCTACCTTCCAAACAGTTTTTGAAAT	4285	2539	12.6849	10.8181	hsa-miR-153-3p	hsa-miR-4763-3p	hsa-miR-3680-3p	hsa-miR-558	hsa-miR-1287-5p
ASCRP3012930	0.00305159	0.0255214	3.48609	up	hsa_circ_0015879	circBase	chr1	+	201286699	201297996	exonic	NM_000299	PKP1	TTCACCTCCCGATTCTAAGAAGAGACTGTCCAAGCAAGTTAGGCTTGCAGGTCTATCAGC	973	506	10.2298	8.44485	hsa-miR-6836-5p	hsa-miR-4459	hsa-miR-4763-3p	hsa-miR-4692	hsa-miR-6808-5p
ASCRP3005032	0.000732236	0.0124992	2.97233	up	hsa_circ_0005232	circBase	chr2	-	40655612	40657441	exonic	ENST00000403092	SLC8A1	CCAGAATGATGAAATTGTGTTGTGACAGTTGGAAGTGTCATGTACAACATGCGGCGATTA	124.5	66	6.50055	4.917	hsa-miR-6888-5p	hsa-miR-27b-3p	hsa-miR-27a-3p	hsa-miR-3180-5p	hsa-miR-373-5p
ASCRP3004884	6.90949e-05	0.00505062	2.88108	up	hsa_circ_0044234	circBase	chr17	-	45247282	45249430	exonic	NM_001256	CDC27	CATTGTTGGGACATGTATATTGTACACTCAGAAGAAGCCTTGTTTTTACTGGCAACCTGT	1611	1067	11.1132	9.53471	hsa-miR-892a	hsa-miR-135b-5p	hsa-miR-135a-5p	hsa-miR-802	hsa-miR-338-5p
ASCRP3006148	0.00218526	0.0215048	2.59964	up	hsa_circ_0079262	circBase	chr7	-	5545042	5545261	exonic	NM_024963	FBXL18	CTCATCCACACCGTGTTGCTGCAAAAGGACTATCAGGACATATCCAATGATGATGATGAC	914	563.5	10.1384	8.60934	hsa-miR-652-5p	hsa-miR-346	hsa-miR-124-3p	hsa-miR-510-5p	hsa-miR-497-5p
ASCRP3013087	0.00312734	0.0258257	2.59498	up	hsa_circ_0000957	circBase	chr19	+	55604158	55604583	antisense	NM_017607	PPP1R12C	TTCTCTGACTCTGGGGCCTTCCCTGCAGCCTTCTCTGCCTCCTTCAGGCCCCCTCCACTC	1364	922	10.8338	9.30882	hsa-miR-6754-5p	hsa-miR-608	hsa-miR-6734-3p	hsa-miR-6848-5p	hsa-miR-518c-5p
ASCRP3008453	0.000572627	0.0112328	2.49779	up	hsa_circ_0006903	circBase	chr12	-	133310970	133312098	exonic	NM_015114	ANKLE2	GATAAAGCCACCACGTCTGGCAGAAGATTTTCGCAAGCTCTGGAAAACTCCACCTCGAGA	491	292	9.09683	7.62847	hsa-miR-204-3p	hsa-miR-130b-5p	hsa-miR-16-1-3p	hsa-miR-26b-3p	hsa-miR-875-5p
ASCRP3001127	0.00349746	0.0275895	2.45421	up	hsa_circ_0059880	circBase	chr20	+	32354656	32358098	exonic	NM_032819	ZNF341	ACAGCCTCCTGCCACAGCACAGCCCCAAGAAGGACAATGCCGTCTACAAGGTTGGGCCAG	315	174	8.3017	6.83345	hsa-miR-6868-3p	hsa-miR-6780b-5p	hsa-miR-1248	hsa-miR-608	hsa-miR-4763-3p
ASCRP3002558	0.00282307	0.0244949	2.32641	up	hsa_circ_0051907	circBase	chr19	+	49999633	50002944	sense overlapping	NM_001015	RPS11	ATAAAGTTATTTTCTCATTCCACTTCCTCTCCAGCCCCTGCGTAATCGATAAGGAAACCC	469.5	280	9.00552	7.53821	hsa-miR-4290	hsa-miR-619-5p	hsa-miR-4530	hsa-miR-3620-3p	hsa-miR-1248
ASCRP3008851	0.00858513	0.0472202	2.29498	up	hsa_circ_0070739	circBase	chr4	+	119526738	119542682	exonic	NR_109983	LOC729218	GCAACATGTTATTCAGACCCACCTAAGCTGAAGATTCCCTTGAGAACAAGTACTGTCCTG	376	220	8.6118	7.14511	hsa-miR-6830-3p	hsa-miR-378j	hsa-miR-6839-5p	hsa-miR-204-3p	hsa-miR-1264
ASCRP3010913	1.87953e-05	0.00381799	2.21372	up	hsa_circ_0006517	circBase	chr3	+	188202379	188242575	exonic	NM_005578	LPP	TATAAGCCTCGGCCTCCACAGGTGATTTTCTTCCACCCCCACCTCCACCTCTAGATGATT	325	188	8.36141	6.89939	hsa-miR-216a-5p	hsa-miR-561-5p	hsa-miR-625-5p	hsa-miR-339-3p	hsa-miR-519e-3p
ASCRP3012330	0.000106134	0.00583319	1.97428	up	hsa_circ_0092329	circBase	chr1	+	26898944	26899164	intronic	ENST00000374162	RPS6KA1	TGGAGACACAGAGCACACCACCTCCGTACCTTGTTGGGGTAACCTGGTGATCATTCATTG	444	263	8.91202	7.45295	hsa-miR-649	hsa-miR-19a-3p	hsa-miR-198	hsa-miR-324-3p	hsa-miR-19b-3p
ASCRP3012369	0.000100877	0.0057991	1.94179	up	hsa_circ_0004099	circBase	chr11	-	9225206	9229179	exonic	NM_015213	DENND5A	TGGAGTTTCAAATCCTGCTCTACTCACAGCCATTATGCCAGTACATACAGGCTTCTAAAG	542.5	342.5	9.27971	7.82365	hsa-miR-508-5p	hsa-miR-561-5p	hsa-miR-616-5p	hsa-miR-761	hsa-miR-328-5p
ASCRP3012399	1.93987e-05	0.00381799	1.90801	up	hsa_circ_0004566	circBase	chr16	-	89484691	89488713	sense overlapping	NM_013275	ANKRD11	TGGATTTAAAAGACAGTCCTCGTCAGCACTGACTTTCAGCTATGGAATCGGGTCTCAGTC	213	114	7.57146	6.11986	hsa-miR-6782-5p	hsa-miR-608	hsa-miR-6752-5p	hsa-miR-4651	hsa-miR-6803-5p
ASCRP3012411	0.000376853	0.00915691	1.90146	up	hsa_circ_0040705	circBase	chr16	+	84792321	84801964	exonic	NM_005153	USP10	TGGCAAGAGAATCTGTCCAAGGTTATACCACAAAAACCAAACAAGAGAGTTGCTGGAGAA	832	542	9.99158	8.5432	hsa-miR-670-3p	hsa-miR-103a-2-5p	hsa-miR-10b-3p	hsa-miR-584-3p	hsa-miR-507
ASCRP3012460	0.000366106	0.00899316	1.87303	up	hsa_circ_0009065	circBase	chr16	+	14738130	14738466	exonic	NM_016561	BFAR	TGGGAAGGTTTCCCCAAAGTCAGTATTCTCCTCAGATTAATGATGTTTTGCAGCAGTTTT	930	606.5	10.1557	8.71067	hsa-miR-627-3p	hsa-miR-449c-5p	hsa-miR-450a-2-3p	hsa-miR-23a-5p	hsa-miR-20a-3p
ASCRP3012559	4.9948e-07	0.00147459	1.86523	up	hsa_circ_0005213	circBase	chrX	+	118540422	118560317	exonic	uc004erc.2	SLC25A43	TGTACACCACATAACCCATCTGAGCCTCATCTTCCTCATCTGTTTTGAGGATTTGTTGTG	1020	671.5	10.301	8.86071	hsa-miR-8085	hsa-miR-6859-5p	hsa-miR-3925-5p	hsa-miR-514b-5p	hsa-miR-544a
ASCRP3012661	0.000230116	0.00740424	1.82203	up	hsa_circ_0020353	circBase	chr10	-	126727565	126727724	exonic	NM_001329	CTBP2	TGTGGATAAGCACAAAGTCAAGAGACAGCGATTGGACAGAATTTGTGAAGGGTTCATAGT	167	94	7.11767	5.67838	hsa-miR-2113	hsa-miR-218-5p	hsa-miR-365b-5p	hsa-miR-383-5p	hsa-miR-570-5p
ASCRP3012669	0.00033627	0.00888369	1.81963	up	hsa_circ_0061251	circBase	chr21	-	11020812	11029717	exonic	uc002yis.1	TPTE	TGTGGTCAGTGTTACCATCCATACTGTGTCAGTATTAAGGAGGCTTGGAGTACCCATAAT	397	238.5	8.70636	7.2711	hsa-miR-203a-3p	hsa-miR-513a-3p	hsa-miR-212-5p	hsa-miR-654-3p	hsa-miR-183-5p
ASCRP3012697	3.00075e-05	0.00416892	1.80874	up	hsa_circ_0092355	circBase	chr17	-	74080841	74081041	intronic	ENST00000332065	EXOC7	TGTTATCTCAAGCTTCTCTGGTCCTCTTTCTTCCTGGCTTTGTTTCTTCCCTTTGAATGT	414.5	246	8.77054	7.33876	hsa-miR-197-5p	hsa-miR-642a-3p	hsa-miR-429	hsa-let-7d-5p	hsa-let-7f-5p
ASCRP3012732	5.26297e-05	0.00476591	1.79324	up	hsa_circ_0001823	circBase	chr8	-	131133277	131133416	intronic	ENST00000357668	ASAP1	TGTTTAAGACTCAGTCAAGATGACACCCAAGGTAAACTGGACAAAGGTGGTAGCAATGAA	694	455	9.6982	8.26699	hsa-miR-548a-3p	hsa-miR-627-5p	hsa-miR-545-3p	hsa-miR-302a-5p	hsa-miR-450a-1-3p
ASCRP3012921	0.000394458	0.00935271	1.78559	up	hsa_circ_0081342	circBase	chr7	+	98984307	98987635	exonic	NM_005720	ARPC1B	TTCAAGTGTCGAGATTGCCATCTGCCCCAACAACCATGAGGTGCATATCTATGAAAAGAG	581.5	374	9.38452	7.95833	hsa-miR-497-5p	hsa-miR-545-3p	hsa-miR-636	hsa-miR-15a-5p	hsa-miR-335-3p
ASCRP3012975	1.91468e-05	0.00381799	1.75081	up	hsa_circ_0003454	circBase	chr15	-	72208710	72231268	exonic	NM_006901	MYO9A	TTCATTTACACAAGAAGAAAAAACCTCCCAGCATCAGTGCCCAGTTTCAGGTATAACCCG	687	449	9.67486	8.24893	hsa-miR-5691	hsa-miR-6779-5p	hsa-miR-1273h-5p	hsa-miR-764	hsa-miR-6780a-5p
ASCRP3012990	0.00802077	0.045428	1.76317	up	hsa_circ_0025135	circBase	chr12	-	6458115	6465046	exonic	NM_001038	SCNN1A	TTCCAGATGCTATCGCGACAGAACAATTACACCGTCAACAACAAGAGGAATTACTCTCAC	508	316	9.1742	7.74849	hsa-miR-361-3p	hsa-miR-873-5p	hsa-miR-7-5p	hsa-miR-761	hsa-miR-153-5p
ASCRP3012993	2.22076e-05	0.00384102	1.74866	up	hsa_circ_0009135	circBase	chr1	-	6021853	6029319	exonic	NM_015102	NPHP4	TTCCAGCTCATGGAGAATCCGCCCTTGTATTTTCACACATCCCTAAACCACCCTCATATC	341.5	200	8.4452	7.02008	hsa-miR-637	hsa-miR-597-3p	hsa-miR-204-3p	hsa-miR-342-5p	hsa-miR-509-5p
ASCRP3013018	6.0168e-05	0.00476591	1.73075	up	hsa_circ_0007378	circBase	chr17	+	42231923	42232779	exonic	NM_001171251	C17orf53	TTCCTCAAGCCATCTCAGCCCTTCCCCAAGGCAGCCCTGAAGCAGCTTCCTAGGAACAAG	391	232	8.66845	7.24993	hsa-miR-450a-2-3p	hsa-miR-497-3p	hsa-let-7i-5p	hsa-miR-98-5p	hsa-let-7b-5p
ASCRP3013080	5.31355e-05	0.00476591	1.63781	up	hsa_circ_0006055	circBase	chr20	-	5086833	5090091	exonic	NM_014145	TMEM230	TTCTCATTATTATAGGCTCCCTCCTGCTGTCAGGCTACATCAGCAAAGGGCTGTGTCAGC	1611	1190.5	11.1132	9.69733	hsa-miR-493-3p	hsa-miR-216a-3p	hsa-miR-302a-5p	hsa-miR-761	hsa-miR-101-3p
ASCRP3013081	0.000667635	0.0120875	1.62782	up	hsa_circ_0034186	circBase	chr15	+	27571955	27574035	exonic	NM_033223	GABRG3	TTCTCCAGCTGAATACCAAATTGACATATTTTTTGCTCAGACCTGGACAGATAGTCGCCT	668.5	444	9.62625	8.21291	hsa-miR-2114-3p	hsa-miR-6823-3p	hsa-miR-541-5p	hsa-miR-5047	hsa-miR-512-5p
ASCRP3013108	2.36419e-06	0.00219193	1.61325	up	hsa_circ_0059797	circBase	chr20	-	31315699	31315949	exonic	NM_053041	COMMD7	TTCTGGTTCCAAATGCAGTTCTCAGCCCTGACAGAGGTGCTTTTCCACTTCCTAACTGAG	660	432.5	9.60309	8.19415	hsa-miR-505-5p	hsa-miR-24-3p	hsa-miR-335-3p	hsa-miR-219a-1-3p	hsa-miR-659-3p
ASCRP3013132	6.03401e-06	0.0027273	1.60623	up	hsa_circ_0089829	circBase	chrX	-	3544459	3560012	exonic	NM_005044	PRKX	TTCTTGCAGGCAAAATAGATTTCCCCAGACATTTGGATTTCCATGTAAAGACTTGGACCC	231	132	7.72822	6.32273	hsa-miR-4422	hsa-miR-6851-3p	hsa-miR-455-3p	hsa-miR-6886-3p	hsa-miR-4489
ASCRP3013245	7.54427e-06	0.00287997	1.60244	up	hsa_circ_0001618	circBase	chr6	+	89790493	89790692	sense overlapping	NM_006813	PNRC1	TTGGCTTTTCCTCCCGAGTCATGTTCCGCGATCTTCTCAGGCTCTCCTAGCAGCATCCAT	238	137	7.78819	6.38447	hsa-miR-6815-5p	hsa-miR-5091	hsa-miR-6760-5p	hsa-miR-4708-3p	hsa-miR-6758-5p
ASCRP3013289	4.03458e-06	0.00249228	1.59995	up	hsa_circ_0090969	circBase	chrX	-	70146376	70148852	exonic	NM_032803	SLC7A3	TTGTGGTCATCTGGAGACAGCCACAGAGTTCCACTCCCCTTCACTTTAAGGTACAGCCAG	313	184	8.27245	6.87911	hsa-miR-214-3p	hsa-miR-921	hsa-miR-761	hsa-miR-497-5p	hsa-miR-6812-5p
ASCRP3013307	2.30936e-05	0.00384102	1.59026	up	hsa_circ_0002727	circBase	chr10	-	88230748	88233730	exonic	NM_015045	WAPAL	TTTAAAACCTTGGATGATTCCCAGCACCATCAGTCACCCACAAAAGCTGTATATAATGCC	12732	12233	14.5771	13.1848	hsa-miR-302c-3p	hsa-miR-302d-3p	hsa-miR-302a-3p	hsa-miR-302b-3p	hsa-miR-329-5p
ASCRP3013406	0.00102698	0.0143932	1.58263	up	hsa_circ_0000676	circBase	chr16	+	16101672	16110478	exonic	NM_004996	ABCC1	TTTCTCAGATCGCTCACCCCTGTTCTCGGAAACCATCCACGACCCTGACTGGAATGTCAC	247	146	7.90716	6.5164	hsa-let-7e-5p	hsa-miR-124-3p	hsa-miR-877-5p	hsa-miR-506-3p	hsa-let-7c-5p
ASCRP3013414	0.000151138	0.00646869	1.57795	up	hsa_circ_0073009	circBase	chr5	-	73923233	73925817	exonic	ENST00000302351	ENC1	TTTCTCTTCACTCACTCCATCACTCGATGAGATAATATGAGATTTCTACTTCGGAGAGGC	1595	1193	11.1009	9.71031	hsa-miR-6734-3p	hsa-miR-6793-3p	hsa-miR-6760-5p	hsa-miR-6756-5p	hsa-miR-942-5p
ASCRP3013550	0.00049831	0.0105269	1.54557	up	hsa_circ_0086684	circBase	chr9	-	33921690	33973235	exonic	NM_018449	UBAP2	TTTTCTCTTGCCCAATCCCCACCTAATAAAGTTCTGAGAGCATGGATTTGGACGTGGCAG	593.5	392.5	9.42198	8.03183	hsa-miR-8089	hsa-miR-3692-5p	hsa-miR-92a-2-5p	hsa-miR-3620-5p	hsa-miR-6829-5p
ASCRP3013555	8.52457e-05	0.0053875	1.52496	up	hsa_circ_0040994	circBase	chr16	-	89807211	89815175	exonic	NM_000135	FANCA	TTTTCTTCTTCTCCTTGATGGGCCTGCTGTCGTCACATCTGACCTCAAATGATCCTCCTC	483	308	9.0816	7.69263	hsa-miR-34c-5p	hsa-miR-34a-5p	hsa-miR-449a	hsa-miR-449b-5p	hsa-miR-486-3p
ASCRP3013571	0.000181189	0.00679256	1.51427	up	hsa_circ_0018909	circBase	chr10	+	76970891	76982160	exonic	NM_003375	VDAC2	TTTTGGCATTGCAGCTAAATATCAGTTGGATCCCACTGCTTCCATTTCTATTCCCCTCTT	1151	828	10.5267	9.14435	hsa-miR-627-3p	hsa-miR-199b-5p	hsa-miR-450b-3p	hsa-miR-769-3p	hsa-miR-154-5p
ASCRP3013582	0.000894534	0.0135604	1.50041	up	hsa_circ_0075215	circBase	chr5	-	176938577	176940848	exonic	NM_016222	DDX41	TTTTGTTTCCTTTTACCCCAGCTGCCATTAAAGCCCAAACCTCTAGCCCACGGTGTACAC	214	126	7.57146	6.1907	hsa-miR-4778-3p	hsa-miR-432-3p	hsa-miR-4726-5p	hsa-miR-7107-3p	hsa-miR-660-3p
ASCRP3001507	2.30534e-06	0.00219193	3.54805	down	hsa_circ_0002473	circBase	chr13	+	96375495	96377506	exonic	NM_006260	DNAJC3	ACTCAAACAAGGAAAACTTGATGAAGCAGAAGATGATTTTAAAAAAGTGATGGTGACCCT	169	748	7.1687	9.00668	hsa-miR-17-3p	hsa-miR-519c-3p	hsa-miR-519a-3p	hsa-miR-519b-3p	hsa-miR-208a-5p
ASCRP3008901	0.000186077	0.00694627	3.21325	down	hsa_circ_0089837	circBase	chrX	-	3778830	3781615	exonic	uc004crl.3	AK000470	GCACTGCTGCCTATGCACTCCATTTACAGGTTAAGAAAATGTGCCAAGATTACCTCAGTA	237.5	1046.5	7.78492	9.51217	hsa-miR-8068	hsa-miR-563	hsa-miR-4761-3p	hsa-miR-5787	hsa-miR-3151-5p
ASCRP3003177	3.57663e-05	0.00452171	3.00623	down	hsa_circ_0014186	circBase	chr1	+	151611363	151655921	exonic	NM_030918	SNX27	ATTACAGAAGCTATACGAACAAAGAAAAATGGTCATGGAACCACGTGAATGTTGAGGGGG	69.5	184	5.28704	6.88725	hsa-miR-627-3p	hsa-miR-410-5p	hsa-miR-20b-3p	hsa-miR-550a-5p	hsa-miR-550a-3-5p
ASCRP3011571	3.86525e-05	0.0045408	2.90244	down	hsa_circ_0003641	circBase	chr11	+	108098321	108106561	exonic	NM_000051	ATM	TCTCAGCAACAGTGGTTAGACAGTGATGTGTGTTCTGAAATTGTGAACCATGAGTCTAGT	120.5	383	6.45742	8.01008	hsa-miR-3145-3p	hsa-miR-567	hsa-miR-4652-3p	hsa-miR-4778-5p	hsa-miR-4677-5p
ASCRP3003019	1.8765e-05	0.00381799	2.89995	down	hsa_circ_0001490	circBase	chr5	+	61653517	61657356	exonic	NM_004520	KIF2A	ATGCATTAGCAGATTGATGAACATAGGATATGTGTGTGTGTAAGAAAACGACCACTCAAT	397	1694	8.70636	10.2377	hsa-miR-659-3p	hsa-miR-5002-5p	hsa-miR-203b-5p	hsa-miR-4460	hsa-miR-6718-5p
ASCRP3011719	2.18594e-05	0.00384102	2.67505	down	hsa_circ_0079385	circBase	chr7	+	6624646	6624891	exonic	NM_018106	ZDHHC4	TCTTTCTTATTCAGGTGTGTGTAACTGGTGTGTGCACCGTTTCGACCATCACTGTGTTTG	173	590	7.20989	8.6767	hsa-miR-499a-3p	hsa-miR-1271-3p	hsa-miR-216a-3p	hsa-miR-197-3p	hsa-miR-489-3p
ASCRP3008380	0.000673145	0.0120992	2.66694	down	hsa_circ_0053944	circBase	chr2	-	33808728	33810511	exonic	uc002roz.1	FAM98A	GAGGTGTGCTTTGTGTGAAAGGTGAGCAATAAAGTATCTGTTAAGTTCGTGTTGATGGGC	229	827	7.72822	9.15028	hsa-miR-877-3p	hsa-miR-6829-3p	hsa-miR-4701-5p	hsa-miR-6791-3p	hsa-miR-5193
ASCRP3006337	0.000885593	0.0135116	2.45421	down	hsa_circ_0048764	circBase	chr19	+	5690345	5691678	exonic	NM_015414	RPL36	CTCTCCCTGAAATAAAGAACAGCTTGACAGAAGTTTCCCGCACTGCCGGTATCCGCCGCC	194	635.5	7.4041	8.79266	hsa-miR-4739	hsa-miR-4677-5p	hsa-miR-24-3p	hsa-miR-6760-5p	hsa-miR-5008-5p
ASCRP3007654	7.09269e-05	0.00505537	2.2	down	hsa_circ_0092360	circBase	chr17	+	27047048	27047688	intronic	ENST00000422514	RPL23A	GAAGTGACCGATTTCTAGTGTGTGTTGGTGATGGGGCCGCAGCTGGTTTACCGGGGATTG	122	324	6.47375	7.74177	hsa-miR-509-5p	hsa-miR-497-3p	hsa-miR-328-3p	hsa-miR-764	hsa-miR-512-5p
ASCRP3005758	0.000163961	0.00660826	2.11369	down	hsa_circ_0003748	circBase	chr3	-	48726970	48728915	exonic	NM_016291	IP6K2	CGTGTGTGTGGCATGCAGCCATAAGTTAGAAGAAGAATTTGAGTGGCTAAAGAAATCTGA	168	496	7.12974	8.39572	hsa-miR-494-5p	hsa-miR-577	hsa-miR-628-5p	hsa-miR-647	hsa-miR-526b-5p
ASCRP3000149	0.000339836	0.00895786	2.02089	down	hsa_circ_0000745	circBase	chr17	+	20107645	20109225	exonic	NM_152904	SPECC1	AAACGGTGAAATTAAACATGTTTCCAGTCTGCTGGCCAAGGGGCCTTTACAACAACTAAA	87	205	5.8042	7.07015	hsa-miR-9-5p	hsa-miR-145-5p	hsa-miR-526b-5p	hsa-miR-578	hsa-miR-29a-5p
ASCRP3004225	0.00116512	0.0154248	1.74041	down	hsa_circ_0000601	circBase	chr15	-	50929618	50941082	exonic	NM_017672	TRPM7	CAGCAAAGAATTCATGCTAGTGTTTTTGTGGTCGCTTGGTCAAGCAACATGCTTGTTTTA	169	501.5	7.1687	8.43412	hsa-miR-4748	hsa-miR-3925-3p	hsa-miR-1-5p	hsa-miR-567	hsa-miR-4464
ASCRP3002532	0.000178628	0.00679256	1.73952	down	hsa_circ_0000169	circBase	chr1	+	198190128	198233365	sense overlapping	NM_133494	NEK7	AGTTTTGGAACTAGCAGATGCTGGCGACCTATCCAGAATGATCAAGGAAAAGGAAACTAT	286	995	8.16094	9.42531	hsa-miR-190a-3p	hsa-miR-580-3p	hsa-miR-548b-5p	hsa-miR-548d-5p	hsa-miR-590-3p
ASCRP3002052	2.30882e-05	0.00384102	1.62324	down	hsa_circ_0002228	circBase	chr7	-	16415716	16445962	exonic	NM_001101426	ISPD	AGCATATCAGCAGAGTATGTTGGATAAAGGACATTGTTGTGGCAGTAACTGGAGAGAACA	141	389	6.76435	8.02815	hsa-miR-3682-5p	hsa-miR-145-5p	hsa-miR-3134	hsa-miR-1261	hsa-miR-8080
ASCRP3006216	0.00175867	0.0193706	1.60165	down	hsa_circ_0092283	circBase	chr22	-	36681395	36681695	intronic	ENST00000216181	MYH9	CTCCCCAAGGTCAGGACTTCTCCCACTCTGGGCTCTGGCTGGAGCCACCACGGCAGAGCT	121	318	6.47375	7.73388	hsa-miR-328-5p	hsa-miR-661	hsa-miR-550a-5p	hsa-miR-550a-3-5p	hsa-miR-525-5p
ASCRP3000513	0.00388973	0.0294637	1.58294	down	hsa_circ_0001296	circBase	chr3	-	47719687	47727660	exonic	NM_003074	SMARCC1	AACTTGACTGGAGATGTGTGTGCTGTGATGAGGAAGATGAAGATCCTGCCAAAGGTGATC	70	143	5.24328	6.50055	hsa-miR-449c-3p	hsa-miR-582-5p	hsa-miR-509-3p	hsa-miR-510-5p	hsa-miR-369-5p
ASCRP3006172	0.000315396	0.00872061	1.5237	down	hsa_circ_0018273	circBase	chr10	-	45954567	45959775	exonic	NM_145021	MARCH8	CTCATTGACCGTACTGCTGAGGAGATCAAGCAGGGGCAGGCAACAGGCTGGGAGTCCTCC	395	1364	8.68198	9.93768	hsa-miR-5693	hsa-miR-29b-2-5p	hsa-miR-4763-3p	hsa-miR-27b-3p	hsa-miR-6511b-5p
ASCRP3002172	0.00906791	0.0486741	1.51493	down	hsa_circ_0001255	circBase	chr22	+	50618381	50618469	sense overlapping	NM_052839	PANX2	AGCTTGAGTGGGAGTGTGTGAGCGTGAGCGAGCGGGTGTGTATGTACGAGTGTGCACGTG	152	431.5	6.93912	8.19415	hsa-miR-2276-5p	hsa-miR-6865-3p	hsa-miR-7112-3p	hsa-miR-593-5p	hsa-miR-6767-3p
